# Supplementary material
Source: MDPI journal article supplement (https://www.mdpi.com/2571-8789/7/4/93)
Supplement: s1 [file s1]

# Supplementary Material

Table S1. Soil chemical and physical attributes in the experimental area.

| Deph   | O.M      | pH<br>(H2O) | Al                   | H + Al | CEC<br>efet. | CEC<br>pH<br>7 | Ca   | Mg  | P                | K    |
|--------|----------|-------------|----------------------|--------|--------------|----------------|------|-----|------------------|------|
| (cm)   | dag kg-1 |             | -----cmolc dm-3----- |        |              |                |      |     | ---- mg dm-3---- |      |
| 0-20   | 0.6      | 4.9         | 0.7                  | 2.1    | 1.5          | 2.9            | 0.6  | 0.2 | 8.4              | 16.0 |
| 20-40  | 0.5      | 5.1         | 0.4                  | 2.4    | 1.4          | 3.4            | 0.8  | 0.2 | 13.2             | 14.2 |
| 40-60  | 0.4      | 5.1         | 0.8                  | 2.0    | 1.6          | 2.8            | 0.6  | 0.1 | 10.2             | 13.0 |
| 60-80  | 0.3      | 5.0         | 0.8                  | 2.3    | 1.5          | 3.0            | 0.6  | 0.1 | 9.5              | 12.0 |
| 80-100 | 0.3      | 5.1         | 0.8                  | 2.6    | 1.4          | 3.2            | 0.5  | 0.1 | 9.3              | 14.6 |
| Deph   | m        | BS          | Sandy coarse         |        | Sandy fine   |                | Silt |     | Clay             |      |
| (cm)   |          |             | -----%-----          |        |              |                |      |     |                  |      |
| 0-20   | 47.1     | 27.7        | 93.1                 |        | 3.6          |                | 0.0  |     | 3.3              |      |
| 20-40  | 36.0     | 27.0        | 92.8                 |        | 5.8          |                | 0.0  |     | 1.4              |      |
| 40-60  | 52.2     | 26.3        | 91.9                 |        | 6.3          |                | 0.0  |     | 1.7              |      |
| 60-80  | 56.5     | 22.8        | 92.8                 |        | 5.0          |                | 0.0  |     | 2.2              |      |
| 80-100 | 57.6     | 19.3        | 92.2                 |        | 5.5          |                | 0.0  |     | 2.3              |      |

P and K: Mehlich-1 Extractor;

Al, Ca and Mg: KCl 1 mol l<sup>-1</sup> Extractor;

H + Al: Ca(OAc)<sub>2</sub> 0.5 mol l<sup>-1</sup> pH 7.0 Extractor;

O.M. = Organic matter; CEC = Cation Exchange capacity; m = Aluminium saturation percentage; BS = Base saturation percentage.

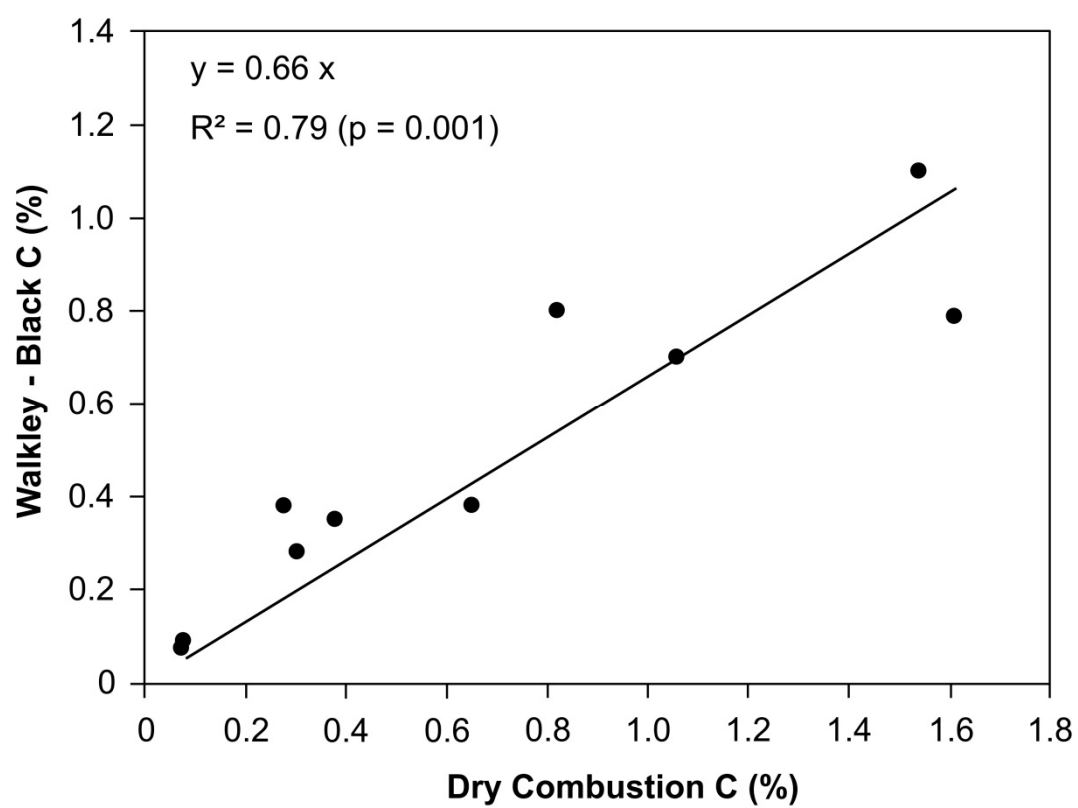

Figure S1. Relationship between C evaluated by Walkley-Black (wet digestion) method and dry combustion method.

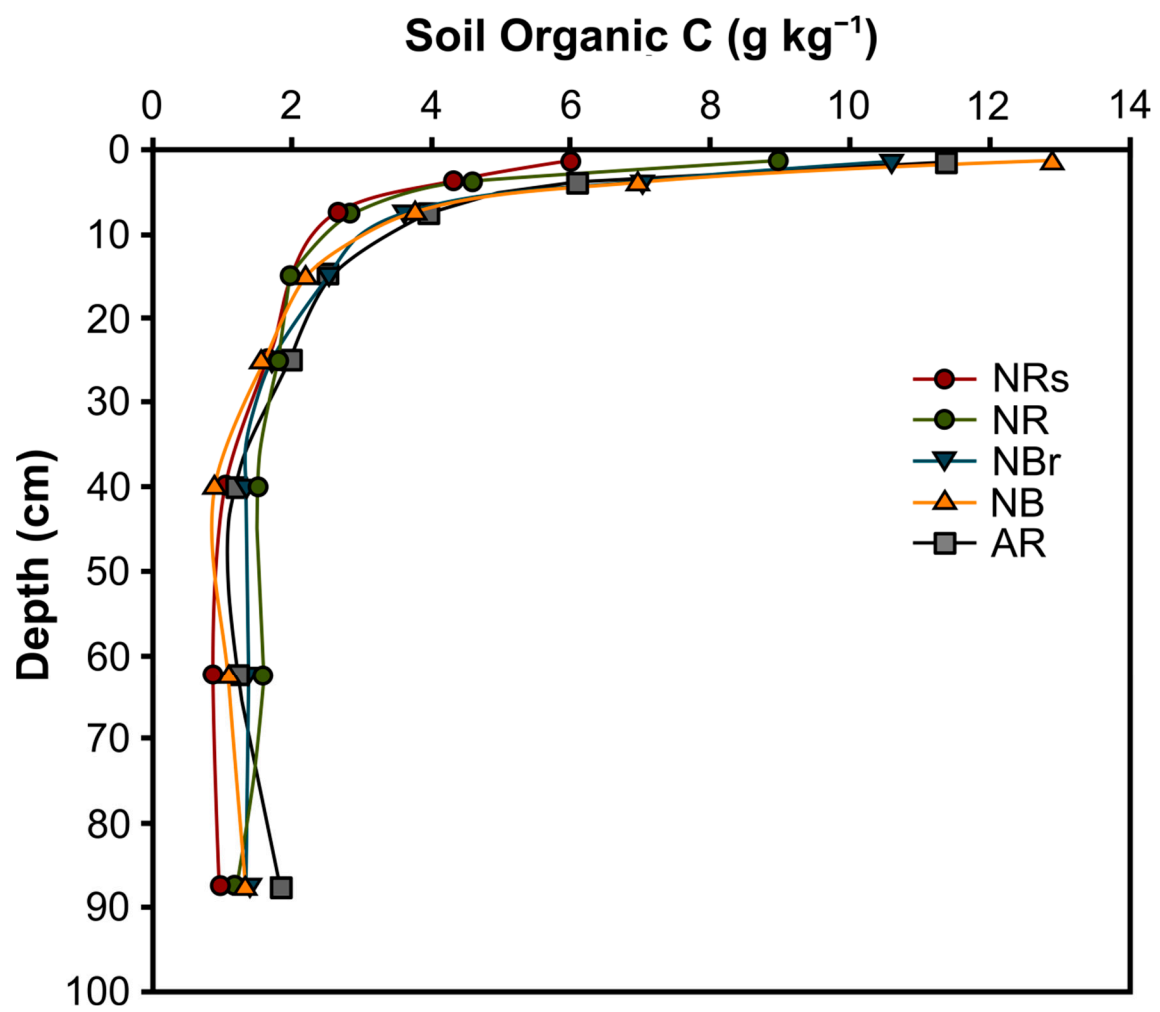

Figure S2. Total organic carbon content of a Quartzarenic Neosol in the 0–100 cm layer, cultivated under different management of eucalyptus harvest residues at six years of age.
